# Supplementary material for: Does TENS Reduce the Intensity of Acute and Chronic Pain? A Comprehensive Appraisal of the Characteristics and Outcomes of 169 Reviews and 49 Meta-Analyses
Source: MDPI journal article supplement (doi:10.3390/medicina57101060), 2021-10-04
Supplement: s1 [file s1]

## Supplementary Material

### Contents

|                                                                                                      |   |
|------------------------------------------------------------------------------------------------------|---|
| 1. Search Terms: Systematic Reviews .....                                                            | 2 |
| 2. Operational Aide Memoires.....                                                                    | 2 |
| 2.1. Eligibility Criteria for Inclusion of Systematic Reviews—Aide Memoire for Eligibility Screening | 2 |
| 2.1.1. Gross Screening of Report Titles and Abstract .....                                           | 2 |
| 2.1.2. Fine Grain Screening of Full Reports.....                                                     | 2 |
| 2.2. Assessing Quality.....                                                                          | 2 |
| 2.3. Categorising Efficacy .....                                                                     | 3 |
| 3. Table S1 - Excluded Records with Reasons .....                                                    | 3 |

## **1. Search Terms: Systematic Reviews**

MEDLINE Search Strategy for systematic reviews:

1. EXP Transcutaneous Electric Nerve Stimulation/
- 2 TENS.ti,ab
- 3 TNS.ti,ab
- 4 ENS.ti,ab
- 5 transcutaneous electric\* nerve stimulation.ti,ab.
- 6 transcutaneous nerve stimulation.ti,ab
- 7 electric\* nerve stimulation.ti,ab
- 8 electrostimulation therap\*.ti,ab
- 9 electro-stimulation therap\*.ti,ab.
- 10 electric\* nerve therap\*.ti,ab
- 11 electroanalgesi\*.ti,ab
- 12 transcutaneous electric\* stimulation.ti,ab.
- 13 TES.ti,ab
- 14 or/1-13
- 15 Pain
- 16 Systematic review. Pt.
- 17 Meta-analysis.pt.
- 18 16 OR 17
- 19 14 AND 15 AND 18

## **2. Operational Aide Memoires**

### ***2.1. Eligibility Criteria for Inclusion of Systematic Reviews—Aide Memoire for Eligibility Screening***

#### **2.1.1. Gross Screening of Report Titles and Abstract**

Do not carry forward if title/abstract indicates ...

1. Definitely NOT acute or chronic pain
2. Definitely NOT adult participants aged 18 years or above
3. Definitely NOT on TENS
  - carry forward if on electrotherapy and then extract RCTs on TENS
  - carry forward if uncertain whether SR focussed on 'standard TENS' (e.g. TENS characteristics (type of currents), type and location of electrodes (acupoints, single probe electrode etc.) and/or type of device (i.e. TENS-like))

Obtain full report

#### **2.1.2. Fine Grain Screening of Full Reports**

Exclude if full report indicates ...

1. Definitely NOT acute or chronic pain
2. Definitely NOT adult participants aged 18 years or above
3. Definitely NOT on TENS
  - carry forward if on electrotherapy and extract RCTs on TENS – include reports with TENS in scope but fail to identify any TENS SRs
  - carry forward if uncertain whether SR focussed on 'standard TENS' (e.g. TENS characteristics (type of currents), type and location of electrodes (acupoints, single probe electrode etc.) and/or type of device (i.e. TENS-like))

Lock included SRs

### ***2.2. Assessing Quality***

Quality of evidence stated by review authors

### 2.3. Categorising Efficacy

We categorised as efficacy as:

- sufficient evidence in favour of TENS (+)
  - pooled analysis of  $\geq 500$  events or at least one RCT with  $\geq 200$  participants in each arm of the trial
- sufficient evidence in favour of control/placebo (-)
  - pooled analysis of  $\geq 500$  events or at least one RCT with  $\geq 200$  participants in each arm of the trial
- sufficient evidence that is conflicting/inconclusive (=)
  - no analysis of pooled data and at least two RCTs with  $\geq 200$  participants in each arm of the trial that are conflicting
- insufficient evidence to make a judgement (?)
  - pooled analysis of  $< 500$  events or no RCTs with  $\geq 200$  participants in each arm of the trial

### 3. Table S1 - Excluded Records with Reasons

Key; Review Type: CR = Cochrane review, SR = Non-Cochrane systematic review (systematic search), DR = Non-Cochrane descriptive review; OSR = Non-Cochrane overview of systematic reviews, OCR = Overview of Cochrane reviews, MA; Meta-analysis of a pain outcome with an effect size estimate provided

Coding for exclusion

- TENS not in scope
- TENS was not evaluated as a primary comparator i.e. TENS was a possible comparator rather than the primary treatment
- TENS in scope but not evaluating pain intensity
- Not evaluating 'standard TENS'
- Not a review
- A review but not using a systematic search for RCTs
- Duplicate of analysis of a review already included
- Analysis subsequently updated – update included in our review
- Not evaluating clinical pain – healthy human participants

**Table S1.** Excluded Records with Reasons

| <b>Authors</b>       | <b>Ref.</b> | <b>Title</b>                                                                                                                                                                                | <b>Reason for Exclusion</b>                                                                               |
|----------------------|-------------|---------------------------------------------------------------------------------------------------------------------------------------------------------------------------------------------|-----------------------------------------------------------------------------------------------------------|
| Almeida et al.       | [245]       | Effects of Transcutaneous Electrical Nerve Stimulation on Proinflammatory Cytokines: Systematic Review and Meta-Analysis.                                                                   | TENS in scope but not evaluating pain intensity                                                           |
| Amatya et al.        | [199]       | Nonpharmacological interventions for spasticity in multiple sclerosis.                                                                                                                      | Analysis subsequently updated – update included in our review by Amatya et al. [192]                      |
| Amer-Cuenca et al.   | [234]       | Pain relief by applying TENS during un-sedated colonoscopy: a randomized double-blind placebo-controlled trial                                                                              | Not a review                                                                                              |
| Anim-Somuah et al.   | [246]       | Epidural versus non-epidural or no analgesia for pain management in labour                                                                                                                  | TENS not in scope                                                                                         |
| Arendt et al.        | [247]       | Nonpharmacologic labor analgesia                                                                                                                                                            | A review but not using a systematic search for RCTs                                                       |
| Barkatsa et al.      | [248]       | Physiotherapy interventions for the management of whiplash injuries.                                                                                                                        | A review but not using a systematic search for RCTs                                                       |
| Bedwell et al.       | [23]        | The use of transcutaneous electrical nerve stimulation (TENS) for pain relief in labour: a review of the evidence                                                                           | Duplicate of analysis of a review already included – this review discusses the CR by Dowswell et al. [22] |
| Bennett et al.       | [240]       | Methodological quality in randomised controlled trials of transcutaneous electric nerve stimulation for pain: low fidelity may explain negative findings                                    | TENS in scope but not evaluating pain intensity                                                           |
| Binder et al.        | [249]       | Comment on Dubinsky et al. [115]                                                                                                                                                            | Not a review                                                                                              |
| Bjrdal et al.        | [250]       | Evidence based use of electrophysical agents for managing musculoskeletal pain                                                                                                              | Not a review                                                                                              |
| Briones-Areán et al. | [251]       | Effectiveness of physiotherapy in shoulder impingement syndrome.                                                                                                                            | TENS not in scope                                                                                         |
| Brosseau et al.      | [252]       | Efficacy of transcutaneous electrical nerve stimulation (TENS) for rheumatoid arthritis: a systematic review.                                                                               | Not a review - Commentary on Cochrane review Brosseau et al. [205]                                        |
| Cadalso et al.       | [253]       | Efficacy of Electrical Stimulation of the Occipital Nerve in Intractable Primary Headache Disorders: A Systematic Review with Meta-Analyses.                                                | TENS not in scope – Occipital nerve stimulation                                                           |
| Cameron et al.       | [254]       | Transcutaneous Electrical Nerve Stimulation (TENS) for dementia                                                                                                                             | TENS in scope but not evaluating pain                                                                     |
| Campo-Prieto et al.  | [255]       | Effectiveness of mirror therapy in phantom limb pain: A literature review                                                                                                                   | TENS not in-scope                                                                                         |
| Carroll et al.       | [152]       | Transcutaneous electrical nerve stimulation in labour pain: a systematic review (in <i>BJOG</i> )                                                                                           | Analysis subsequently updated – update included in our review by Carroll et al. [144]                     |
| Chan et al.          | [256]       | Postherpetic neuralgia: Review of treatment modalities                                                                                                                                      | Not using a systematic search for RCTs                                                                    |
| Chaparro et al.      | [257]       | Opioids compared to placebo or other treatments for chronic low-back pain                                                                                                                   | TENS not in scope                                                                                         |
| Chen et al.          | [258]       | Does the pulse frequency of transcutaneous electrical nerve stimulation (TENS) influence hypoalgesia? A systematic review of studies using experimental pain and healthy human participants | Not evaluating clinical pain – healthy human participants                                                 |
| Chesterton et al.    | [259]       | Transcutaneous electrical nerve stimulation for the management of tennis elbow: a pragmatic randomized controlled trial: the TATE trial                                                     | Not a review                                                                                              |
| Choi et al.          | [260]       | Acupuncture and related interventions for the treatment of symptoms associated with carpal tunnel syndrome.                                                                                 | TENS not in scope                                                                                         |
| Claydon et al.       | [261]       | Dose-specific effects of transcutaneous electrical nerve stimulation (TENS) on experimental pain: a systematic review                                                                       | Not evaluating clinical pain – healthy human participants                                                 |
| Claydon et al.       | [262]       | The hypoalgesic efficacy of TENS parameters on experimental pain models in healthy humans: a systematic review                                                                              | Not evaluating clinical pain – healthy human participants                                                 |

|                      |       |                                                                                                                                                              |                                                                                                                                                                          |
|----------------------|-------|--------------------------------------------------------------------------------------------------------------------------------------------------------------|--------------------------------------------------------------------------------------------------------------------------------------------------------------------------|
| Cruccu et al.        | [21]  | EFNS guidelines on neurostimulation therapy for neuropathic pain                                                                                             | TENS not in scope –TENS was in scope in previous version and we have included this earlier version in our review Cruccu et al. [20]                                      |
| Deussen et al.       | [216] | Analgesia for relief of pain due to uterine cramping/involution after birth (Review)                                                                         | Analysis subsequently updated – update included in our review by Deussen et al. [215]                                                                                    |
| Dingemanse et al.    | [263] | Epicondylitis                                                                                                                                                | This was the e-pub version citation of the paper that was excluded as a duplicate at full text screening stage – we included the final review by Dingemanse et al. [185] |
| Doyle et al.         | [264] | Interventions for sensory impairment in the upper limb after stroke.                                                                                         | TENS in scope but not evaluating pain intensity                                                                                                                          |
| Ducic et al.         | [265] | A systematic review of peripheral nerve interventional treatments for chronic headaches.                                                                     | TENS not in scope                                                                                                                                                        |
| Eberhart et al.      | [266] | Transient neurologic symptoms after spinal anesthesia. A quantitative systematic overview (meta-analysis) of randomized controlled studies].                 | TENS not in scope                                                                                                                                                        |
| Eccleston et al.     | [267] | Interventions for the reduction of prescribed opioid use in chronic non-cancer pain.                                                                         | TENS in scope but not evaluating pain intensity – the review only included studies where there was prescribed opioid use - pain intensity was a secondary outcome        |
| Ely et al.           | [268] | Transcutaneous electrical nerve stimulation (TENS) at acupuncture points for the management of chronic pain: a narrative review                              | Not using a systematic search for RCTs - Abstract only                                                                                                                   |
| Fargas-Babjak et al. | [269] | Acupuncture, transcutaneous electrical nerve stimulation, and laser therapy in chronic pain                                                                  | Not a review                                                                                                                                                             |
| Foletti et al.       | [270] | Neurostimulation technology for the treatment of chronic pain: A focus on spinal cord stimulation                                                            | TENS not in scope                                                                                                                                                        |
| Freyne et al.        | [271] | Evidence-based physiotherapy in thoracic surgery after pulmonary resection by thoracotomy                                                                    | Duplicate of analysis of a review already included - French version of the report by Freyne et al. [142]                                                                 |
| Fu et al. et al.     | [272] | A mixed treatment comparison on efficacy and safety of treatments for spasticity caused by multiple sclerosis: a systematic review and network meta-analysis | TENS in scope but not evaluating pain intensity - spasticity not pain                                                                                                    |
| Gabler et al.        | [273] | Comparison of Transcutaneous Electrical Nerve Stimulation and Cryotherapy for Increasing Quadriceps Activation in Patients with Knee Pathologies             | TENS in scope but not evaluating pain intensity                                                                                                                          |
| Gadsby et al.        | [274] | CLBP                                                                                                                                                         | Not a review – Statement of review withdrawn from Cochrane                                                                                                               |
| Gadsby et al.        | [275] | CLBP                                                                                                                                                         | Not a review – Statement of review withdrawn from Cochrane                                                                                                               |
| Gross et al.         | [276] | Manipulation and mobilisation for neck pain contrasted against an inactive control or another active treatment (Review)                                      | TENS was not evaluated as a primary comparator i.e. TENS was a possible comparator rather than the primary treatment                                                     |
| Hall et al.          | [277] | Low back pain (acute)                                                                                                                                        | Analysis subsequently updated by McIntosh and Hall [124] – update included in our review                                                                                 |
| Hall et al.          | [114] | Low back pain (chronic)                                                                                                                                      | Analysis subsequently updated by Chou [113] – update included in our review                                                                                              |
| Handy et al.         | [278] | Meta-analysis examining the effectiveness of electrical stimulation in improving functional use of the upper limb in stroke patients                         | TENS in scope but not evaluating pain intensity                                                                                                                          |
| Hawker et al.        | [279] | Osteoarthritis year 2010 in review: non-pharmacologic therapy                                                                                                | TENS not in scope                                                                                                                                                        |
| Ho et al.            | [280] | Sphenopalatine ganglion: block, radiofrequency ablation and neurostimulation - a systematic review                                                           | TENS not in scope                                                                                                                                                        |
| Hoffman et al.       | [281] | Commentary - Review: transcutaneous electrical nerve stimulation is not effective for chronic low-back pain                                                  | Not a review - Commentary on review by Milne et al. [120]                                                                                                                |
| Hu et al.            | [282] | The effectiveness of acupuncture or TENS for phantom limb syndrome. II: A narrative review of case studies                                                   | Not a review                                                                                                                                                             |
| Hunsinger et al.     | [283] | Adverse event reporting in nonpharmacologic, noninterventional pain clinical trials: ACTION systematic review                                                | TENS in scope but not evaluating pain intensity                                                                                                                          |

|                   |       |                                                                                                                                                                                            |                                                                                                                                                                                                      |
|-------------------|-------|--------------------------------------------------------------------------------------------------------------------------------------------------------------------------------------------|------------------------------------------------------------------------------------------------------------------------------------------------------------------------------------------------------|
| Jamtvedt et al.   | [284] | Choice of treatment modalities was not influenced by pain, severity or co-morbidity in patients with knee osteoarthritis                                                                   | TENS in scope but not evaluating pain intensity                                                                                                                                                      |
| Jayasekara et al. | [285] | Acute pain                                                                                                                                                                                 | Not a review - Commentary on Cochrane review by Walsh et al. that was subsequently updated by Johnson et al. [83]                                                                                    |
| Johnson et al.    | [286] | Transcutaneous Electrical Nerve Stimulation (TENS): a review                                                                                                                               | Not a systematic search for RCTs                                                                                                                                                                     |
| Johnson et al.    | [287] | The clinical effectiveness of TENS in pain management                                                                                                                                      | Not a systematic search for RCTs                                                                                                                                                                     |
| Johnson et al.    | [288] | Transcutaneous electrical nerve stimulation (TENS) and TENS-like devices: do they provide pain relief?                                                                                     | Not a systematic search for RCTs                                                                                                                                                                     |
| Johnson et al.    | [289] | Transcutaneous electrical nerve stimulation (TENS) as an adjunct for pain management in perioperative settings: A critical review                                                          | Not a systematic search for RCTs                                                                                                                                                                     |
| Johnson et al.    | [290] | Transcutaneous electrical nerve stimulation for the management of painful conditions: Focus on neuropathic pain.                                                                           | Not a systematic search for RCTs                                                                                                                                                                     |
| Jordan et al.     | [291] | Interventions to improve adherence to exercise for chronic musculoskeletal pain in adults                                                                                                  | TENS not in scope                                                                                                                                                                                    |
| Kang et al.       | [292] | Therapeutic methods for knee osteoarthritis: randomized controlled trial and systemic evaluation                                                                                           | TENS not in scope                                                                                                                                                                                    |
| Khadilkar et al.  | [119] | Transcutaneous electrical nerve stimulation (TENS) for chronic low-back pain (Review)                                                                                                      | Analysis subsequently updated – update included in our review by Khadilkar et al. [100]                                                                                                              |
| Khadilkar et al.  | [293] | Transcutaneous electrical nerve stimulation for the treatment of chronic low back pain: a systematic review                                                                                | Analysis subsequently updated - This is a journal version (Spine 2005; 30(23):2657-66) of the Cochrane review published by Khadilkar et al. [119]                                                    |
| Khalil et al.     | [294] | Treatment for meralgia paraesthetica                                                                                                                                                       | TENS not in scope – conservative measures were in scope but defined as ‘Conservative advice may include avoidance of external compressive and traumatic factors’ rather than electrophysical agents. |
| Khan et al.       | [295] | Non-pharmacological interventions for spasticity in adults: An overview of systematic reviews                                                                                              | TENS in scope but not evaluating pain intensity - spasticity not pain                                                                                                                                |
| Kirpalani et al.  | [296] | Comparison of 2 methods of non-invasive treatment between transcutaneous electrical stimulation and pulsed electromagnetic field stimulation as replacement of invasive manual acupuncture | Not a review                                                                                                                                                                                         |
| Klomp et al.      | [297] | Inhaled analgesia for pain management in labour.                                                                                                                                           | TENS was not evaluated as a primary comparator i.e. TENS was a possible comparator rather than the primary treatment                                                                                 |
| Koes et al.       | [298] | Spinal manipulation and mobilisation for back and neck pain                                                                                                                                | TENS was not evaluated as a primary comparator i.e. TENS was a possible comparator rather than the primary treatment                                                                                 |
| Koes et al.       | [299] | Spinal manipulation for low back pain. An updated systematic review of randomized clinical trials                                                                                          | TENS was not evaluated as a primary comparator i.e. TENS was a possible comparator rather than the primary treatment                                                                                 |
| Knotkova et al.   | [12]  | Neuromodulation for chronic pain                                                                                                                                                           | Not using a systematic search for RCTs                                                                                                                                                               |
| Koopman et al.    | [300] | Treatment for postpolio syndrome.                                                                                                                                                          | TENS not in scope                                                                                                                                                                                    |
| Kosseim et al.    | [301] | Implementing evidence-based physiotherapy practice for treating children with low back pain: are we there yet?                                                                             | Not using a systematic search for RCTs                                                                                                                                                               |
| Kroeling et al.   | [302] | Electrotherapy for neck disorders (Review)                                                                                                                                                 | Analysis subsequently updated – update included in our review by Kroeling et al. [132]                                                                                                               |
| Kus and Yeldan    | [303] | Strengthening the quadriceps femoris muscle versus other knee training programs for the treatment of knee osteoarthritis                                                                   | TENS was not evaluated as a primary comparator i.e. TENS was a possible comparator rather than the primary treatment                                                                                 |
| Kwan et al.       | [196] | Pain relief for women undergoing oocyte retrieval for assisted reproduction (Review)                                                                                                       | TENS was a Cochrane review - analysis subsequently updated and included in our review Kwan et al.[189]                                                                                               |
| Lee et al.        | [304] | Some Non-FDA Approved Uses for Neuromodulation: A Review of the Evidence.                                                                                                                  | TENS not in scope                                                                                                                                                                                    |

|                       |       |                                                                                                                                                                                               |                                                                                                                                                                                                                                   |
|-----------------------|-------|-----------------------------------------------------------------------------------------------------------------------------------------------------------------------------------------------|-----------------------------------------------------------------------------------------------------------------------------------------------------------------------------------------------------------------------------------|
| Lenza et al.          | [305] | Surgical versus conservative interventions for treating fractures of the middle third of the clavicle.                                                                                        | TENS was not evaluated as a primary comparator i.e. TENS was a possible comparator rather than the primary treatment - focus of review was surgical interventions compared with conservative treatments - no TENS RCTs were found |
| Lin et al.            | [306] | Rehabilitation for ankle fractures in adults.                                                                                                                                                 | TENS in scope but not evaluating pain intensity                                                                                                                                                                                   |
| Lindsley et al.       | [307] | Non-surgical interventions for acute internal hordeolum                                                                                                                                       | TENS not in scope                                                                                                                                                                                                                 |
| Mahmood et al.        | [308] | Effect of Transcutaneous Electrical Nerve Stimulation on Spasticity in Adults with Stroke: A Systematic Review and Meta-analysis                                                              | TENS in scope but not evaluating pain intensity - spasticity not pain                                                                                                                                                             |
| Marcolino et al.      | [309] | Effects of transcutaneous electrical nerve stimulation alone or as additional therapy on chronic post-stroke spasticity: systematic review and meta-analysis of randomized                    | TENS in scope but not evaluating pain intensity - spasticity not pain                                                                                                                                                             |
| Marti-Carvajal et al. | [310] | Interventions for treating painful sickle cell crisis during pregnancy                                                                                                                        | TENS not in scope                                                                                                                                                                                                                 |
| McQuay et al.         | [3]   | Systematic review of outpatient services for chronic pain control. Chapter 8 Transcutaneous electrical nerve stimulation                                                                      | Duplicate of analysis of a review already included by Carroll et al. [144] which was an update of Carrol et al. [152] and reports on acute pain from McQuay et al. [4]                                                            |
| Milne et al.          | [120] | Transcutaneous electrical nerve stimulation (TENS) for chronic low back pain                                                                                                                  | Analysis subsequently updated – update included in our review by Khadilkar et al. [100]                                                                                                                                           |
| Miller et al.         | [311] | Manual therapy and exercise for neck pain: Clinical treatment pocket notes.                                                                                                                   | Not a systematic search for RCTs                                                                                                                                                                                                  |
| Moisset et al.        | [312] | Neuromodulation techniques for acute and preventive migraine treatment: a systematic review and meta-analysis of randomized controlled trials                                                 | Not evaluating 'standard TENS' - supraorbital TENS                                                                                                                                                                                |
| Mollon et al.         | [313] | Electrical stimulation for long-bone fracture-healing: a meta-analysis of randomized controlled trials                                                                                        | TENS in scope but not evaluating pain intensity                                                                                                                                                                                   |
| Monaghan et al.       | [314] | Surface neuromuscular electrical stimulation for quadriceps strengthening pre and post total knee replacement                                                                                 | TENS not in scope                                                                                                                                                                                                                 |
| Muller et al.         | [315] | Apropos the meta-analyses, randomization and postoperative pain relief with transcutaneous nerve stimulation.                                                                                 | Not a review - Commentary on review Carroll et al. [5]                                                                                                                                                                            |
| Mulvey et al.         | [316] | Phantom pain and stump pain following amputation in adults                                                                                                                                    | Analysis subsequently updated – update included in our review by Johnson et al. [203]                                                                                                                                             |
| Mulvey et al.         | [317] | Transcutaneous Electrical Nerve Stimulation for Phantom Pain and Stump Pain in Adult Amputees                                                                                                 | Not a review – open label study                                                                                                                                                                                                   |
| Mulvey et al.         | [318] | Transcutaneous electrical nerve stimulation (TENS) for phantom pain and stump pain following amputation in adults: an extended analysis of excluded studies from a Cochrane systematic review | Analysis subsequently updated – this is an extended report of Mulvey et al. [316] which was subsequently updated and included in our review by Johnson et al. [203]                                                               |
| Munirama et al.       | [319] | A systematic review and meta-analysis of ultrasound versus electrical stimulation for peripheral nerve location and blockade                                                                  | TENS in scope but not evaluating pain intensity                                                                                                                                                                                   |
| Nnoaham et al.        | [236] | Withdrawn: TENS for chronic pain                                                                                                                                                              | Not a review – Statement that review withdrawn from Cochrane                                                                                                                                                                      |
| Novak et al.          | [320] | How clinically relevant is a meta-analysis of electrical nerve stimulation when based on heterogeneous disease states?                                                                        | Not a review - Commentary on review Johnson and Martinson [10]                                                                                                                                                                    |
| O'Connell et al.      | [321] | Non-invasive brain stimulation techniques for chronic pain                                                                                                                                    | TENS not in scope – analysis subsequently updated                                                                                                                                                                                 |
| O'Connell et al.      | [322] | Non-invasive brain stimulation techniques for chronic pain.                                                                                                                                   | TENS not in scope – updated review of O'Connell et al. [321]                                                                                                                                                                      |
| O'Gallagher et al.    | [323] | Systemic treatment for blepharokerato conjunctivitis in children                                                                                                                              | TENS not in scope                                                                                                                                                                                                                 |
| Pelland et al.        | [324] | Electrical stimulation for the treatment of rheumatoid arthritis (Review)                                                                                                                     | Analysis subsequently updated – update included in our review by Brosseau et al. [205]                                                                                                                                            |
| Peters et al.         | [213] | Rehabilitation following carpal tunnel release                                                                                                                                                | TENS not in scope                                                                                                                                                                                                                 |
| Poropat et al.        | [325] | Enteral nutrition formulations for acute pancreatitis.                                                                                                                                        | TENS not in scope nor evaluating pain intensity                                                                                                                                                                                   |

|                          |       |                                                                                                                                                                          |                                                                                                                                                                                                       |
|--------------------------|-------|--------------------------------------------------------------------------------------------------------------------------------------------------------------------------|-------------------------------------------------------------------------------------------------------------------------------------------------------------------------------------------------------|
| Price et al.             | [326] | Electrical stimulation for preventing and treating post-stroke shoulder pain: a systematic Cochrane review                                                               | Duplicate of analysis of a review already included by Price and Pandyan [72] – this is a journal report in <i>Clinical Rehabilitation</i> of Cochrane review with identical analysis but one less RCT |
| Proietti Cecchini et al. | [327] | Emerging therapies for chronic migraine.                                                                                                                                 | TENS not in scope                                                                                                                                                                                     |
| Redgrave et al.          | [328] | Safety and tolerability of Transcutaneous Vagus Nerve stimulation in humans                                                                                              | TENS not in scope – using vagal TENS rather than standard TENS                                                                                                                                        |
| Reed et al.              | [329] | Review of acute and chronic pain published studies                                                                                                                       | Not using a systematic search for RCTs                                                                                                                                                                |
| Renner et al.            | [330] | Pain control in first trimester surgical abortion.                                                                                                                       | TENS not in scope                                                                                                                                                                                     |
| Richards et al.          | [331] | Neuromodulators for pain management in rheumatoid arthritis                                                                                                              | TENS not in scope                                                                                                                                                                                     |
| Riker                    | [266] | Efficacy of TENS in the treatment of pain in neurologic disorders (an evidence-based review)                                                                             | Not a review – Comment on Dubinsky et al. [115]                                                                                                                                                       |
| Robb et al.              | [180] | Transcutaneous electric nerve stimulation (TENS) for cancer pain in adults (Review)                                                                                      | Analysis subsequently updated – update included in our review by Hurlow et al. [168]                                                                                                                  |
| Robb et al.              | [332] | A Cochrane Systematic Review of Transcutaneous Electrical Nerve Stimulation for Cancer Pain                                                                              | This is a duplicate of analysis of a review already included by Robb et al. [180] published in <i>Journal of Pain &amp; Symptom Management</i>                                                        |
| Rojahn et al.            | [333] | Transcutaneous Electrostimulation for Osteoarthritis of the Knee.                                                                                                        | Not a review - Commentary on Rutjes et al. [78]                                                                                                                                                       |
| Rome et al.              | [334] | Interventions for preventing and treating stress fractures and stress reactions of bone of the lower limbs in young adults                                               | TENS in scope but not evaluating pain intensity                                                                                                                                                       |
| Rosted et al.            | [335] | Use of stimulation techniques in pain treatment                                                                                                                          | TENS not in scope                                                                                                                                                                                     |
| Saarto et al.            | [336] | Antidepressants for neuropathic pain – Cochrane review                                                                                                                   | TENS not in scope                                                                                                                                                                                     |
| Saulle et al.            | [337] | Supervised dosing with a long-acting opioid medication in the management of opioid dependence                                                                            | TENS not in scope                                                                                                                                                                                     |
| Scott et al.             | [338] | Managing low back pain in the primary care setting: The know-do gap                                                                                                      | Not using a systematic search for RCTs                                                                                                                                                                |
| Singh et al.             | [339] | Complementary and Alternative Medicine in Cancer Pain Management: A Systematic Review                                                                                    | TENS not in scope                                                                                                                                                                                     |
| Sluka et al.             | [340] | What Makes Transcutaneous Electrical Nerve Stimulation Work? Making Sense of the Mixed Results in the Clinical Literature.                                               | Not a review – Commentary                                                                                                                                                                             |
| Smith et al.             | [341] | Massage, reflexology and other manual methods for pain management in labour                                                                                              | TENS not in scope                                                                                                                                                                                     |
| Stuiver et al.           | [342] | Conservative interventions for preventing clinically detectable upper limb lymphoedema in patients who are at risk of developing lymphoedema after breast cancer therapy | TENS in scope but not evaluating pain intensity                                                                                                                                                       |
| Tashani and Johnson      | [343] | TENS. A Possible Aid for Pain Relief in Developing Countries?                                                                                                            | Not using a systematic search for RCTs – narrative review                                                                                                                                             |
| Tirlapur et al.          | [344] | Nerve stimulation for chronic pelvic pain and bladder pain syndrome: A systematic review                                                                                 | TENS not in scope                                                                                                                                                                                     |
| Twycross et al.          | [345] | Paediatric nurses' postoperative pain management practices in hospital based non-critical care settings: A narrative review                                              | Not using a systematic search for RCTs                                                                                                                                                                |
| Tzortziou Brown et al.   | [346] | Professional interventions for general practitioners on the management of musculoskeletal conditions.                                                                    | TENS not in scope                                                                                                                                                                                     |
| Veves et al.             | [347] | Painful diabetic neuropathy: epidemiology, natural history, early diagnosis, and treatment options.                                                                      | TENS not in scope                                                                                                                                                                                     |
| Walsh et al.             | [348] | The evolution of TENS                                                                                                                                                    | Not using a systematic search for RCTs                                                                                                                                                                |
| Walsh et al.             | [349] | Transcutaneous electrical nerve stimulation for acute pain (2009)                                                                                                        | Analysis subsequently updated by Walsh et al. 2015 [355]                                                                                                                                              |
| Walsh et al.             | [350] | Transcutaneous electrical nerve stimulation for acute pain (2015)                                                                                                        | Analysis subsequently updated – update included in our review by Johnson et al. [83]                                                                                                                  |
| Weiner et al.            | [351] | Complementary and alternative approaches to the treatment of persistent musculoskeletal pain.                                                                            | TENS not in scope                                                                                                                                                                                     |
| Wiffen                   | [352] | Pain and palliative care in The Cochrane Library                                                                                                                         | Not a review                                                                                                                                                                                          |
| Wiffen                   | [353] | Pain and palliative care in The Cochrane Library                                                                                                                         | Not a review                                                                                                                                                                                          |
| Wiffen                   | [354] | Pain and palliative care in The Cochrane Library                                                                                                                         | Not a review                                                                                                                                                                                          |



|                   |       |                                                                                                                                     |                                                                                                                            |
|-------------------|-------|-------------------------------------------------------------------------------------------------------------------------------------|----------------------------------------------------------------------------------------------------------------------------|
| Wiffen            | [355] | Pain and palliative care in The Cochrane Library                                                                                    | Not a review                                                                                                               |
| Wiffen            | [356] | Carbamazepine for chronic neuropathic pain and fibromyalgia in adults.                                                              | TENS not in scope                                                                                                          |
| Zhang et al.      | [357] | OARSI recommendations for the management of hip and knee osteoarthritis, Part II: OARSI evidence-based, expert consensus guidelines | Secondary report - Did not include the analysis of efficacy. Analysis of efficacy presented in Part I by Zhang et al. [55] |
| Zakrzewska et al. | [358] | Neurosurgical interventions for the treatment of classical trigeminal neuralgia                                                     | TENS not in scope                                                                                                          |
|                   |       |                                                                                                                                     |                                                                                                                            |
